# Supplementary material for: Inflammation triggers immediate rather than progressive changes in monocyte differentiation in the small intestine
Source: PubMed Central journal article supplement (PMC6642215; doi:10.1038/s41467-019-11148-2), 2019-07-19
Supplement: 41467_2019_11148_MOESM1_ESM.pdf [file 41467_2019_11148_MOESM1_ESM.pdf]

## Supplementary Information

**Inflammation triggers immediate rather than progressive changes in monocyte differentiation in the small intestine**

Desalegn and Pabst

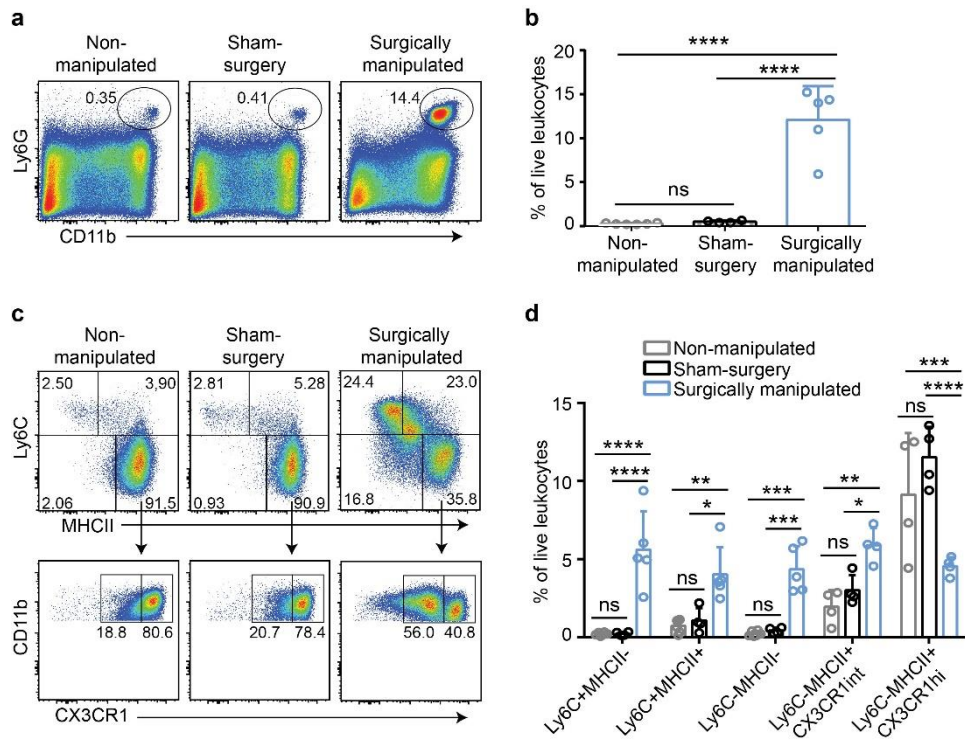

**Supplementary Figure 1 | Intestinal manipulation, but not sham surgery, induces inflammation in the small intestine.** CX3CR1<sup>gfp/+</sup> mice were left untouched (non-manipulated), underwent laparotomy (sham surgery) or underwent laparotomy followed by mechanical manipulation of the small intestine (surgically manipulated). Small intestinal myeloid cells were analyzed 2 days after the procedure (a) Representative FACS plots showing the frequency of CD11b<sup>+</sup>Ly6G<sup>+</sup> neutrophils among live leukocytes in non-manipulated, sham surgery and surgically manipulated mice. (b) Frequency of CD11b<sup>+</sup>Ly6G<sup>+</sup> neutrophils in small intestinal lamina propria. Data were pooled from at least 2 independent experiments with a total of at least 5 mice each. One-way ANOVA followed by Sidak's multiple comparison tests; mean±s.d.; ns, not significant; \*\*\*\*  $p < 0.0001$ . (c) Representative FACS plots showing expression of Ly6C, MHCII and CX3CR1/GFP among endogenous CD64<sup>+</sup>CD11b<sup>+</sup>Ly6G<sup>-</sup> cells (MNP<sup>CD64+</sup>). (d) Frequency of respective subsets of MNP<sup>CD64+</sup> cells in small intestinal lamina propria of non-manipulated, sham surgery and surgically manipulated CX3CR1<sup>gfp/+</sup> mice. Data were pooled from at least 2 independent experiments with a total of at least 4 mice each. Two-way ANOVA followed by Sidak's multiple comparison tests; mean±s.d.; ns, not significant; \*  $p < 0.05$ , \*\*  $p < 0.01$ , \*\*\*  $p < 0.001$ , \*\*\*\*  $p < 0.0001$ .

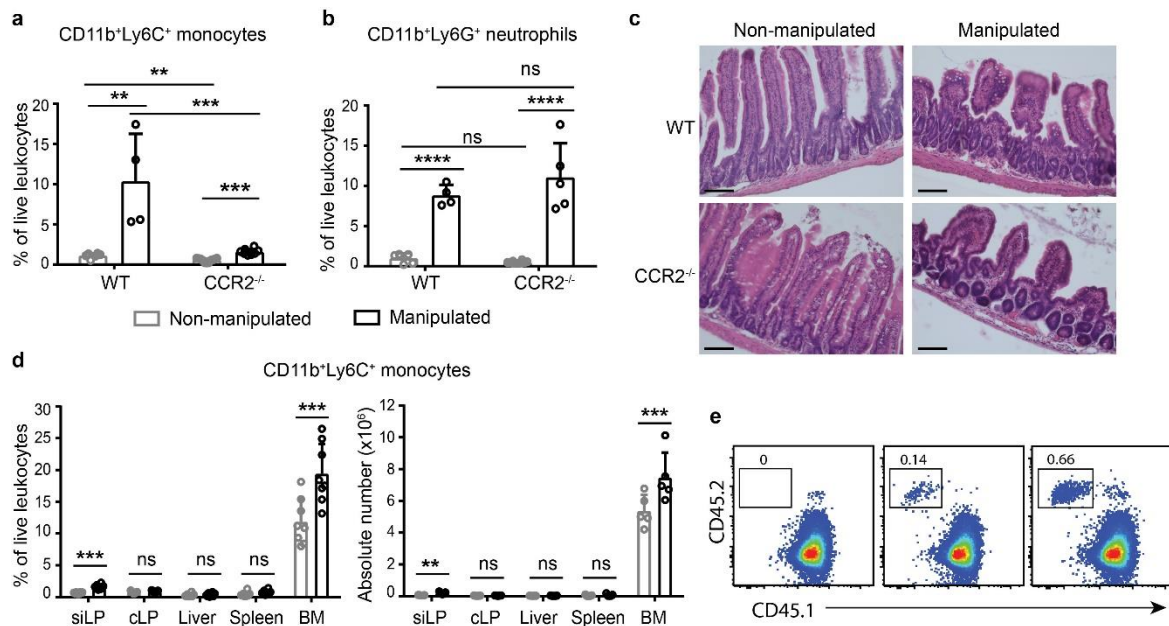

**Supplementary figure 2 | Small intestinal manipulation induces inflammation in the small intestine of WT and CCR2<sup>-/-</sup> mice.** (a-d) Small intestines of WT and CCR2<sup>-/-</sup> mice were surgically manipulated and 2 days later, mice were sacrificed for analysis. Frequency of CD11b<sup>+</sup>Ly6C<sup>+</sup> endogenous monocytes (a) and CD11b<sup>+</sup>Ly6G<sup>+</sup> neutrophils (b) among live leukocytes in small intestines of non-manipulated and manipulated WT and CCR2<sup>-/-</sup> mice. Data were pooled from at least 2 independent experiments with a total of at least 4 mice each. Two-way ANOVA followed by Sidak's multiple comparison tests; mean $\pm$ s.d.; ns, not significant; \*  $p < 0.05$ , \*\*  $p < 0.01$ , \*\*\*  $p < 0.001$ , \*\*\*\*  $p < 0.0001$ . (c) H&E staining of paraffin section taken from jejunum of non-manipulated and manipulated WT and CCR2<sup>-/-</sup> mice (Scale bar, 100 $\mu$ m). (d) Frequency among live leukocytes and absolute number of CD11b<sup>+</sup>Ly6C<sup>+</sup> endogenous monocytes in small intestine, liver, spleen and BM of non-manipulated and manipulated CCR2<sup>-/-</sup> mice. Data were pooled from at least 3 independent experiments with a total of at least 5 mice each. Unpaired *t*-test; mean $\pm$ s.d.; ns, not significant; \*\*\*  $p < 0.001$ . (e) Representative FACS plot of donor cells among live CD11b<sup>+</sup> cells isolated from small intestine of non-manipulated WT (middle panel) and CCR2<sup>-/-</sup> (right panel) recipients one day after transfer and PBS injected control (left panel). Data are representative of at least 2 independent experiments.

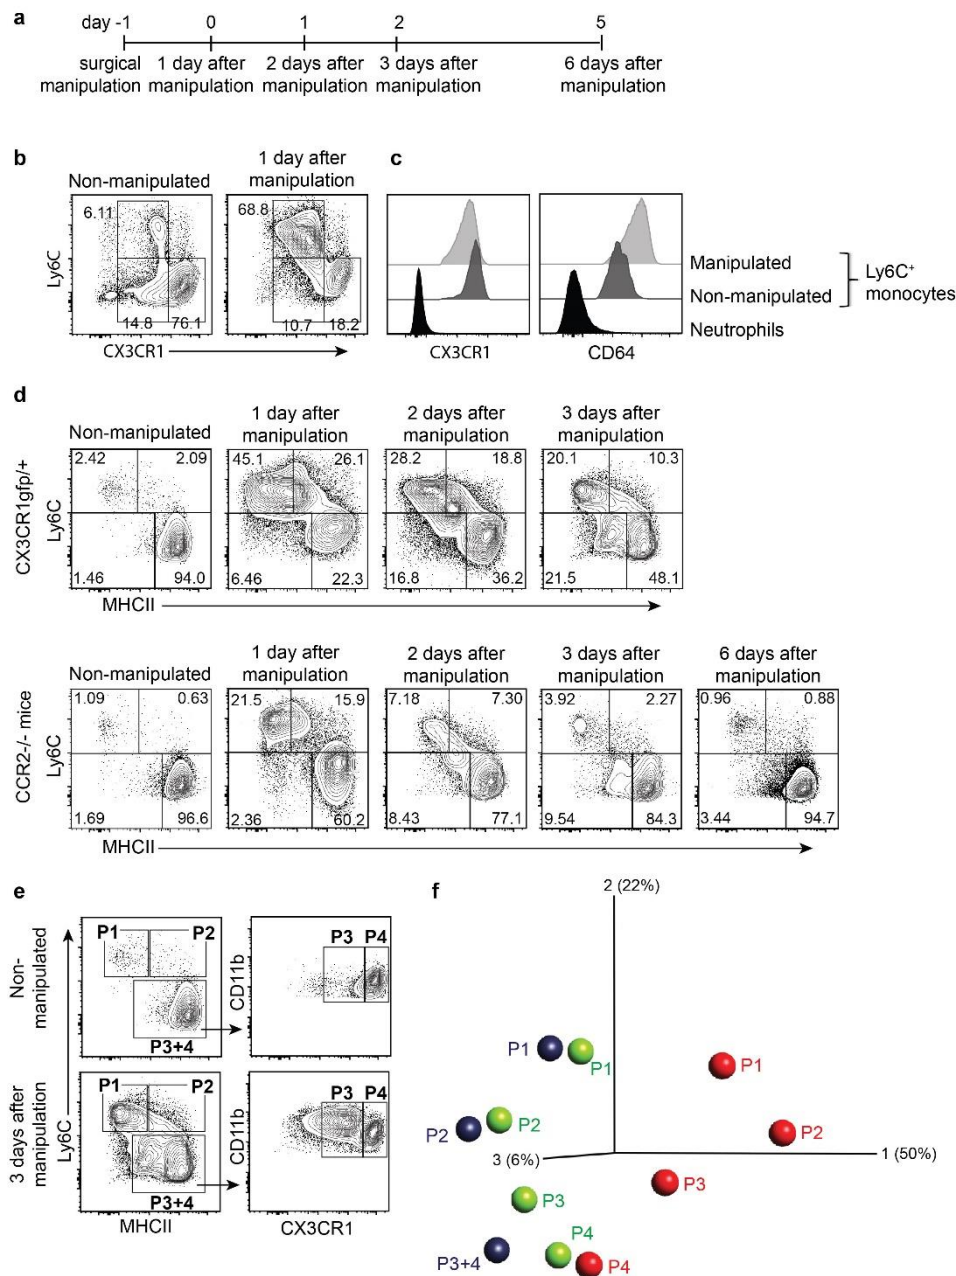

**Supplementary figure 3 | Endogenous populations of MNPs in CCR2-deficient mice resemble the phenotypes observed in WT mice.**

(a) Schematic illustration of the experimental set-up. Please note that we label the day of manipulation as ‘-1’ to align panels displayed in this figure with figures 3 and 4. (b) Phenotypic comparison of intestinal MNP<sup>CD64+</sup> cells from non-manipulated and manipulated mice. One day after surgical manipulation of the small intestine in CX3CR1<sup>gfp/+</sup> mice, MNP<sup>CD64+</sup> cells were characterized based on expression of Ly6C and CX3CR1/GFP and compared to cells isolated from non-manipulated mice. (c) Representative histograms demonstrating expression of CX3CR1 and CD64 on Ly6C<sup>+</sup>CX3CR1<sup>int</sup>

monocytes (as gated in **b**) and neutrophils (CD11b<sup>+</sup>Ly6G<sup>+</sup>) for comparison. **(d)** Representative FACS plots comparing MNP<sup>CD64+</sup> populations between CX3CR1<sup>gfp/+</sup> mice and CCR2-deficient mice. Population frequencies differ between both mouse strains. However, qualitatively the changes in the populations from CCR2-deficient mice resemble the kinetics observed in CX3CR1<sup>gfp/+</sup> mice. **(e)** Sorting strategies for MNP<sup>CD64+</sup> cells from CCR2-deficient and CX3CR1<sup>gfp/+</sup> mice. Endogenous MNP<sup>CD64+</sup> cells were sorted to obtain populations P1, P2, P3 and P4 as indicated from non-manipulated CX3CR1<sup>gfp/+</sup> mice and 3 days after manipulation. For comparison populations P1, P3 and P3+P4 were obtained from non-manipulated CCR2-deficient mice. **(f)** The populations sorted in **e** were analyzed by nanostring analysis. PCA analysis reveals a higher similarity between P1, P2, and P3+P4 comparing non-manipulated CX3CR1<sup>gfp/+</sup> (green symbols) and CCR2-deficient mice (blue symbols) as compared to manipulated CX3CR1<sup>gfp/+</sup> mice (red symbols). Data in **b-e** are representative of at least 2 independent experiments. Data in **f** depict a single experiment.

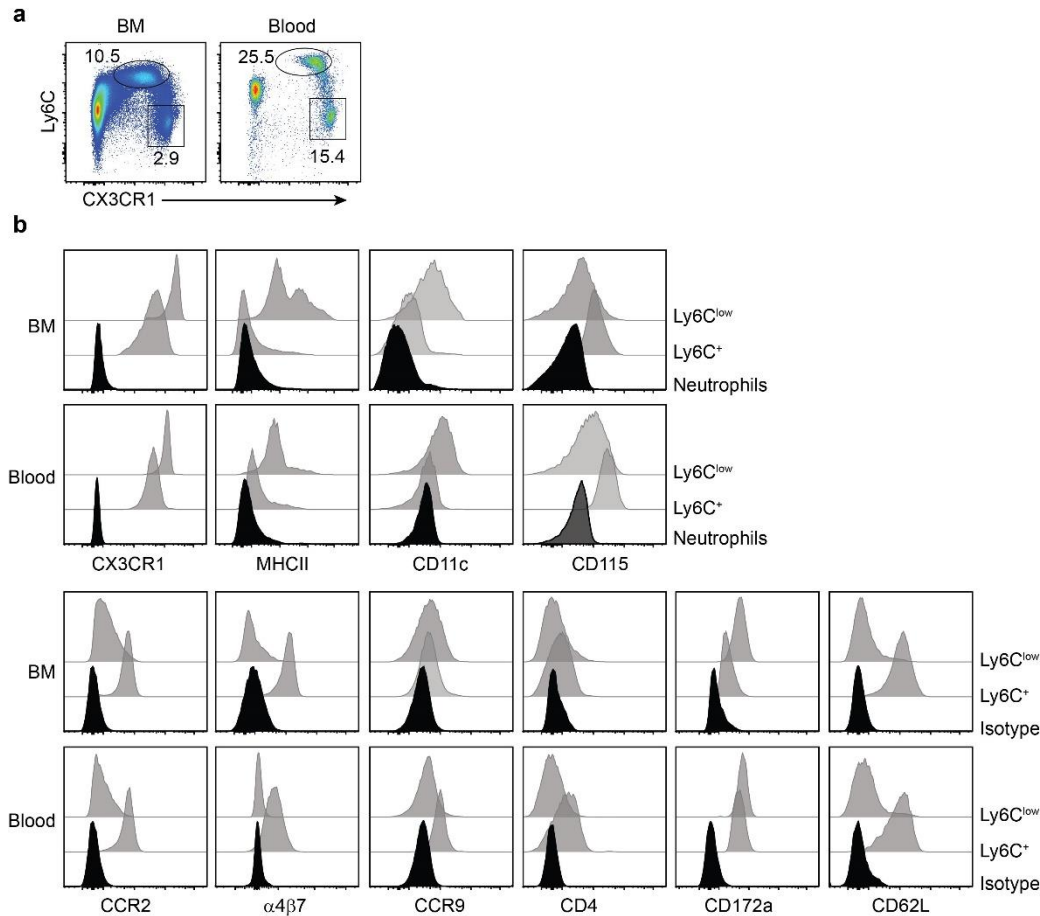

**Supplementary Figure 4 | Ly6C<sup>+</sup> monocytes appear as a homogeneous population in BM and blood.** (a) Representative FACS plots demonstrating Ly6C<sup>+</sup> and Ly6C<sup>-</sup> monocytes after gating on live CD11b<sup>+</sup> leukocytes in the BM and blood of CX3CR1<sup>gfp/+</sup> mice. (b) Phenotyping of Ly6C<sup>+</sup> cells. Top, expression of CX3CR1/GFP, MHCII, CD11c and CD115 on Ly6C<sup>+</sup> and Ly6C<sup>low</sup> monocytes compared to endogenous neutrophils. Bottom, expression of CCR2,  $\alpha 4\beta 7$ , CCR9, CD4, CD172a and CD62L on Ly6C<sup>+</sup> and Ly6C<sup>low</sup> monocytes and isotype controls. Data are representative of at least 2 independent experiments with at least 4 mice each.

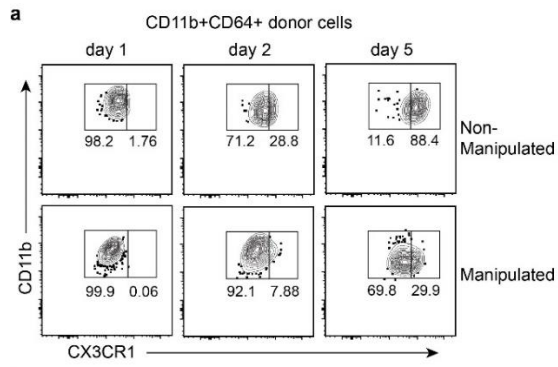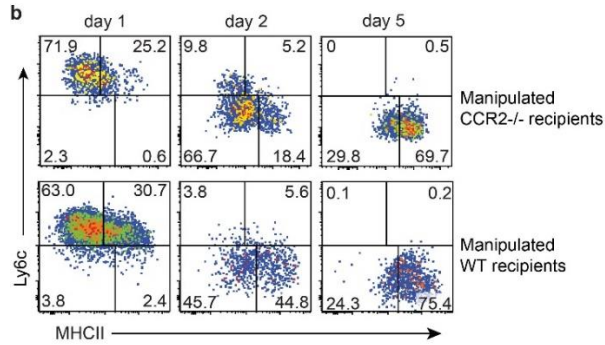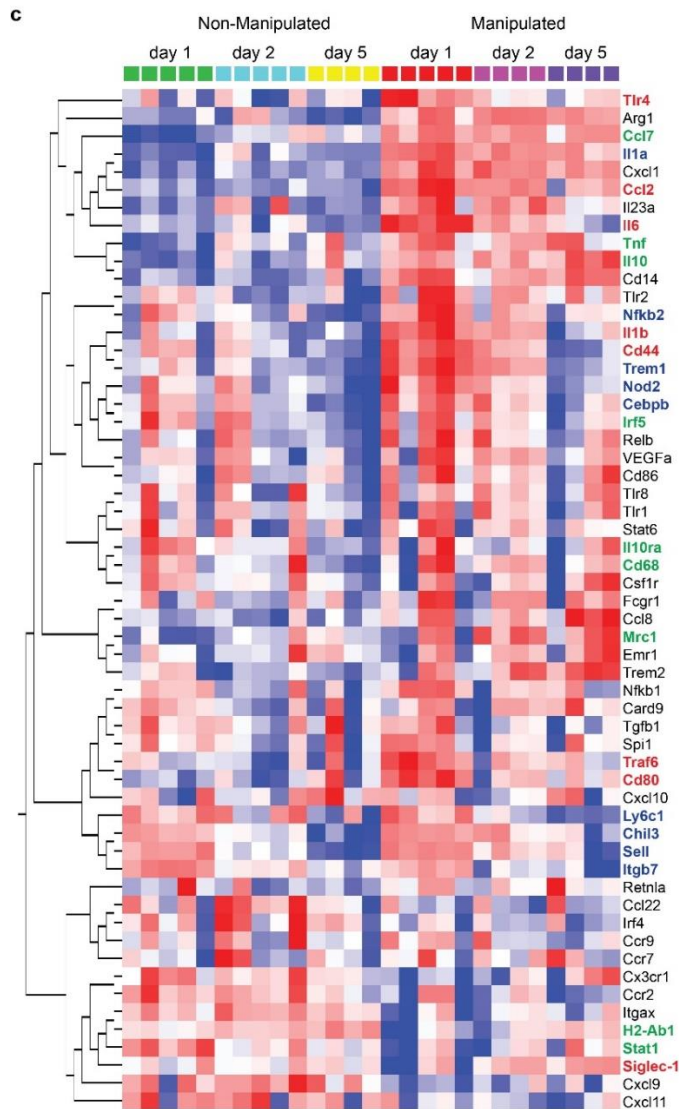

**Supplementary Figure 5 | Inflammation alters monocyte differentiation program in the small intestine.**

(a) CX3CR1 expression of donor MNP<sup>CD64+</sup> cells isolated from the small intestine of non-manipulated and manipulated CCR2-deficient recipients at day 1, 2 and 5 post-transfer. (b) Representative FACS plots comparing phenotypic changes of donor MNP<sup>CD64+</sup> cells over time, with respect to their expression of Ly6C and MHCII. The upper panel demonstrates the phenotype of MNP<sup>CD64+</sup> cells in CCR2-deficient recipients (data depicted are identical to Fig. 4e and are shown here for direct comparison), the lower panel shows the phenotype in WT recipients. (c) Heat map demonstrating the expression profile of all detectable genes that were included in the nanostring analysis in adoptively transferred MNP<sup>CD64+</sup> cells that were recovered small intestinal lamina propria (siLP) of non-manipulated and manipulated recipients at day 1, 2 and 5 after transfer. Genes that were differentially expressed at different time points in non-manipulated recipients are labeled green, in manipulated recipients are labeled red, and in both manipulated and non-manipulated recipients are labeled blue (cut-off *p* value is 0.05). Genes typed in black font did not differ significantly in their expression.



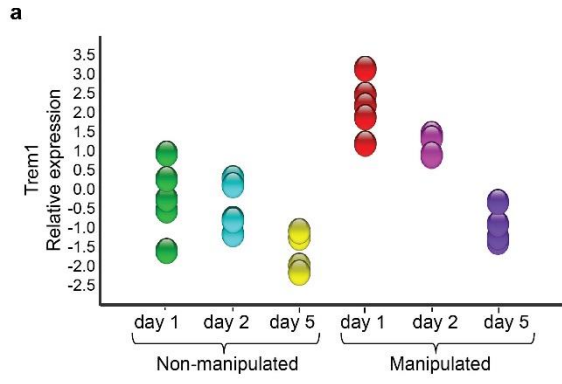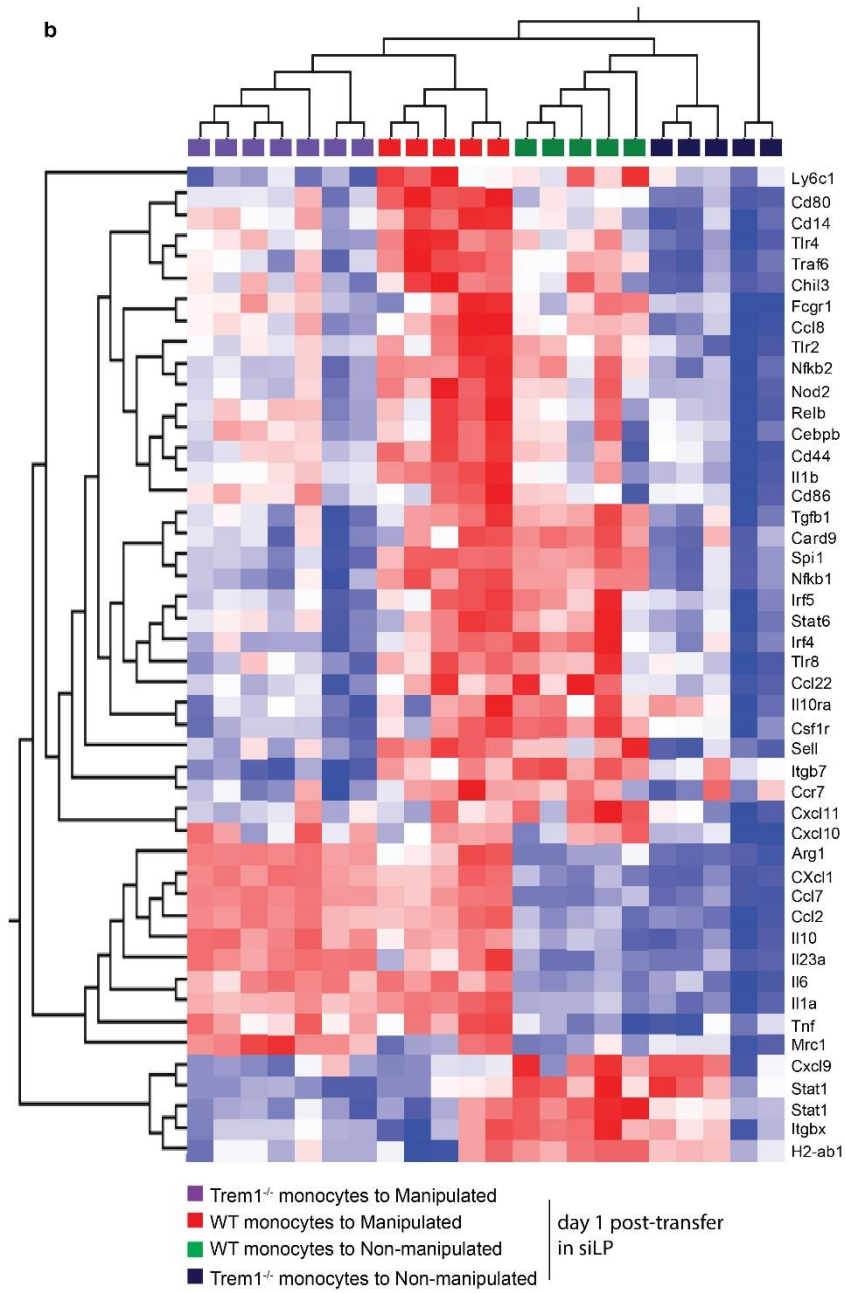

**Supplementary Figure 6 | Small intestinal inflammation shapes the transcriptomic signature of incoming monocytes in a partially Trem1-dependent mechanism** (a) Relative expression of Trem-1 determined by the nanostring analysis depicted in Supplementary Figure 5b. Expression was normalized according to the mean expression observed in non-manipulated recipients one day after transfer. (b) Heat map showing hierarchal clustering of gene expression profiles of adoptively transferred MNP<sup>CD64+</sup> WT or Trem-1<sup>-/-</sup> cells. Donor monocyte-derived cells were recovered from from small intestinal lamina propria (siLP) of recipient mice one day after adoptive transfer. Recipients were surgically manipulated one day before adoptive transfer (manipulated recipients) or non-manipulated. Gene expression were determined by nanostring nCounter analysis and differentially expressed genes were determined by Qlucore Omics explorer with a statistical significance *p* value of 0.05. Data for WT cells are identical to data depicted in for day 1 in Supplementary Figure 5b. Additionally, Trem1-deficient monocytes were analyzed one day after transfer into manipulated recipients or non-manipulated recipients and compared to WT monocytes. Findings in Trem1 deficient cells were pooled from 2 independent experiments with a total of 5-7 recipients analyzed.

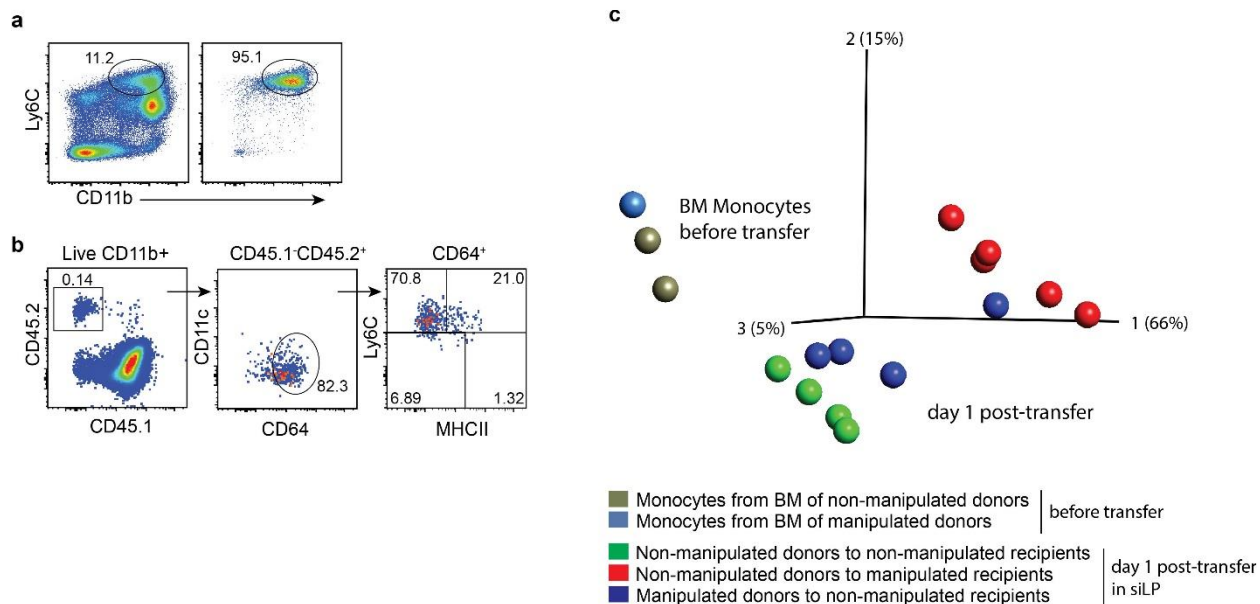

**Supplementary Figure 7 | Small intestinal inflammation of recipient but not of monocyte donor mice profoundly affects the phenotype of monocytes entering the intestine.** (a) Representative FACS plots demonstrating frequencies of CD11b<sup>+</sup>Ly6C<sup>+</sup> monocytes among live leukocytes in the BM of manipulated donor WT mice before (left panel) and after enrichment (right panel). BM cells were isolated and CD11b<sup>+</sup>Ly6C<sup>+</sup> monocytes were purified one day after manipulation of the small intestine of donor mice. Compare with Fig. 1a. (b) Transferred cells were identified by congenic markers (left panel) and the donor monocytes identified as CD11b<sup>+</sup>CD11c<sup>low/int</sup>CD64<sup>+</sup> cells (middle panel) from small intestinal lamina propria (siLP) of recipient mice. Donor MNP<sup>CD64+</sup> cells were further characterized based on Ly6C and MHCII expression (right panel). (c) PCA representing transcriptomic profiles of purified BM monocytes from non-manipulated (light grey) and manipulated (light blue) donors, and adoptively transferred MNP<sup>CD64+</sup> cells recovered from siLP of non-manipulated (green) and manipulated (dark blue) recipients (red) at day 1 post-transfer. Donor cells derived from manipulated and non-manipulated donors were more similar to each other as compared to monocytes recovered from manipulated recipients. Symbols represent individual mice analyzed. Qlucore Omics explorer was used for gene expression analysis and a statistical significance *p* value of 0.05 was used to determine differentially expressed genes.

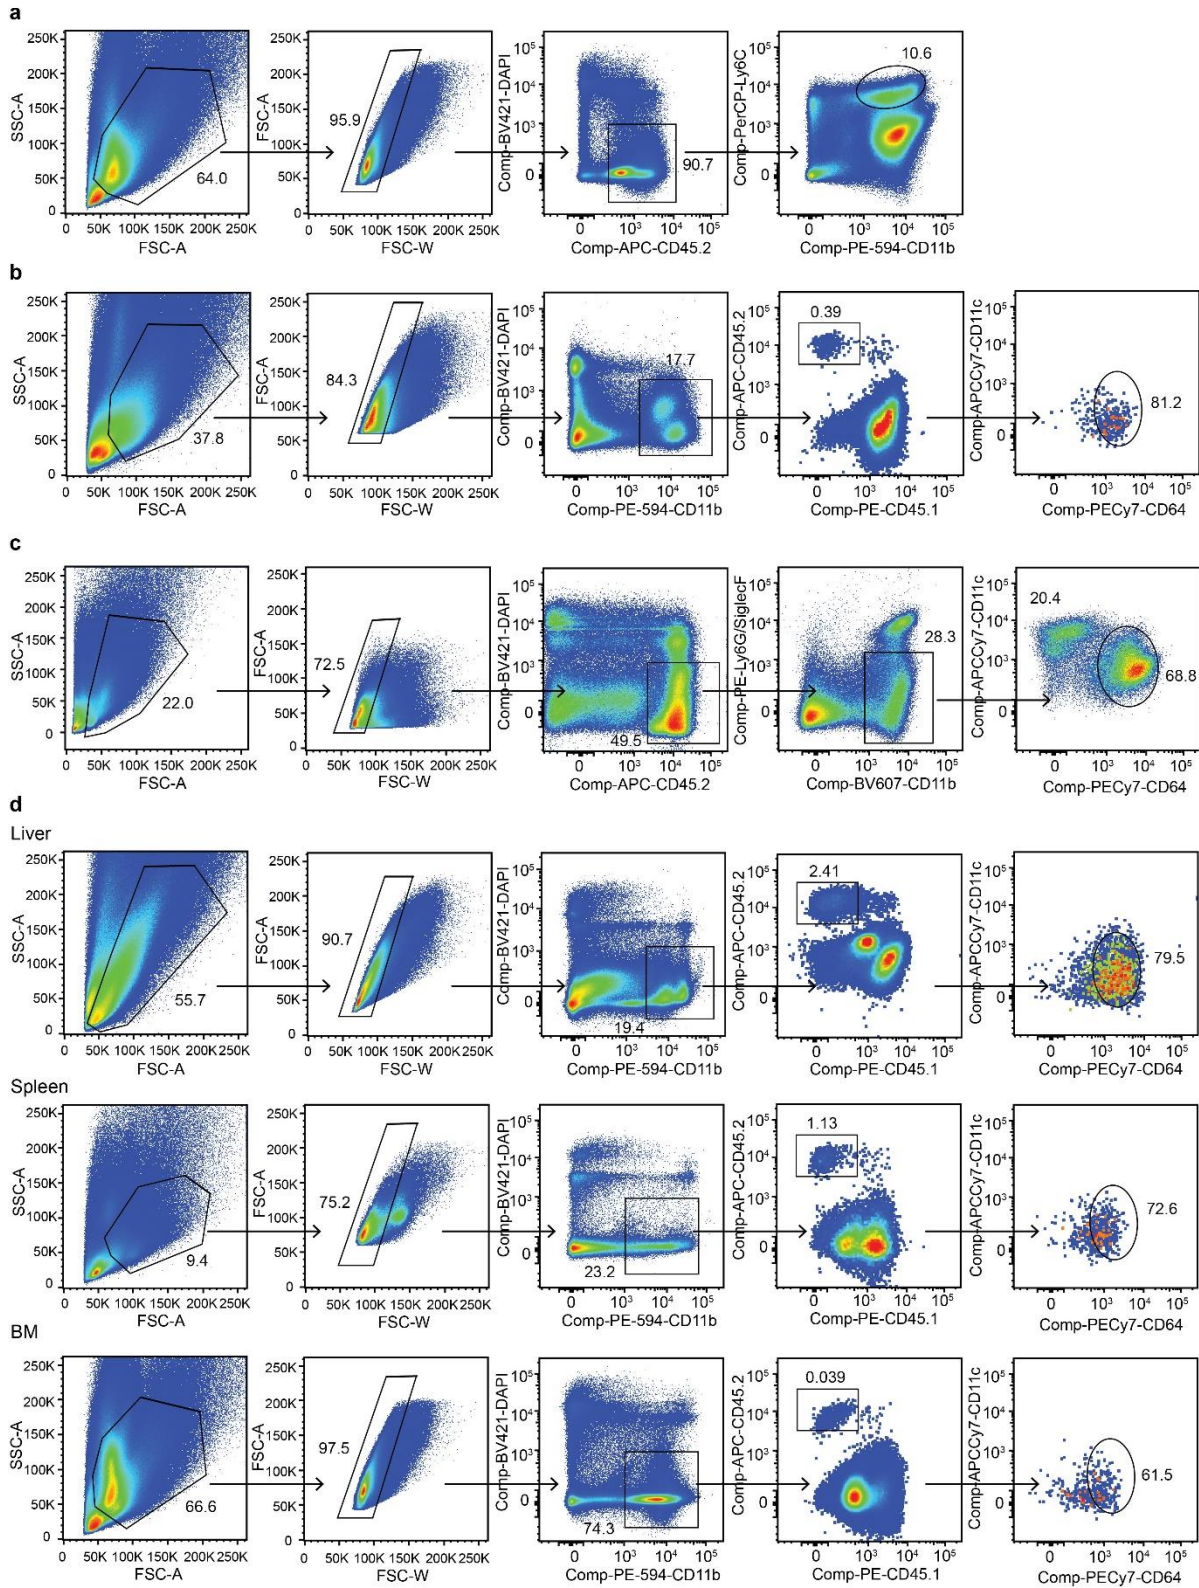

**Supplementary Figure 8 | FACS gating strategies. (a)** Representative plots showing the gating strategy of BM cells to identify CD11b<sup>+</sup>Ly6C<sup>+</sup> monocytes (used in Figure 1a). **(b)** Representative plots showing the gating strategy used to recover and sort donor monocyte-derived MNP<sup>CD64+</sup> cells from the small intestine

of recipients (used in Figure 1d, 2c, 3d and 4d). **(c)** Representative plots showing the gating strategy used to define endogenous MNP<sup>CD64+</sup> cells from small intestine of CX3CR1<sup>gfp/+</sup> mice (used in Figure 3a and 4a). **(d)** Representative plots showing the gating strategy used to recover and sort donor monocyte-derived MNP<sup>CD64+</sup> cells from the liver, spleen and BM of recipients (used to generate data displayed in Figure 6).

## Supplementary Tables

**Supplementary Table 1: List of genes and sequences of respective MTE primers**

| Genes               | NSID (Accession #)  | Primers                  |                       |
|---------------------|---------------------|--------------------------|-----------------------|
|                     |                     | Forward Sequence         | Reverse Sequence      |
| Actb*               | NM_007393.1:815     | TATGAGCTGCCTGACGGC       | CAGCAATGCCTGGGTACA    |
| Arg1                | NM_007482.3:626     | CTGGGTGACTCCCTGCAT       | AGCCCGTCGACATCAAAG    |
| Card9               | NM_001037747.1:1227 | GCTGGGTGAGAAGGCAGA       | TCTGAGAGCTGGGCATCC    |
| Ccl2                | NM_011333.3:415     | ACCTGGATCGGAACCAAA       | GGCATCACAGTCCGAGTCA   |
| Ccl22               | NM_009137.2:1096    | GGAATCTTTCTCCATCCCT      | GCAGTCACTGACACCATAGCA |
| Ccl7                | NM_013654.2:215     | AATGCATCCACATGCTGC       | AAGGCTTTGGAGTTGGGG    |
| Ccl8                | NM_021443.2:150     | CCCTGTCAGCCCAGAGAA       | CCCCTTCTGTGTGGGGT     |
| Ccr2                | NM_009915.2:2965    | TGCCAAGGTTGAAAATAGTTCAT  | TTGCATGCACACATGACATC  |
| Ccr7                | NM_007719.2:755     | TACAGCGGCCTCCAGAAG       | ACCACGGCAATGATCACC    |
| Ccr8 <sup>#</sup>   | NM_007720.2:426     | GTGGGTGTTGGGACTGC        | ATCAAGGGGATGGTGGCT    |
| Ccr9                | NM_009913.6:820     | GGGGTTTTCTCCCTT          | GCGTCAACAGCCTGCAC     |
| Cd14                | NM_009841.3:235     | CGTGTGCTTGGCTTGTG        | CCCAGATCTGCTTCCGTG    |
| Cd163 <sup>#</sup>  | NM_053094.2:3225    | TCCAGTGCCTCCAAAAA        | CCAGATCATCCGCCTTTG    |
| Cd44                | NM_001039150.1:2475 | CAGGGAACATCCACCAGC       | TAGCATCACCTTTGGGG     |
| Cd68                | NM_009853.1:636     | ACCCATCCCCACCTGTCT       | GCTTGCATTTCCACAGCA    |
| Cd80                | NM_009855.2:210     | GCCTAAGCTCCATTGGCTC      | ACGGCAAGGCAGCAATAC    |
| Cd86                | NM_019388.3:251     | ATCTGCCGTGCCATTTA        | ACGAGCCCATGTCCTTGA    |
| Cebpb               | NM_009883.3:1147    | TGCACCGAGGGGACAC         | AACCCCGCAGGAACATCT    |
| Chil3               | NM_009892.1:1196    | GGGAGATCTCAATATACACAGTGC | CCCAGCTGGTACAGCAGAC   |
| Csf1r               | NM_001037859.2:1892 | CCCCGATGAGTCCCTCTT       | CCGAGGGAActCCCACTT    |
| Csf2 <sup>#</sup>   | NM_009969.4:452     | GCCCTGAACCTCCTGGAT       | GCTGTCATGTTCAAGGCG    |
| Cx3cl1 <sup>#</sup> | NM_009142.3:125     | TTCCTGCACTCCAGCCAT       | TGCTGTGTCGTCTCCAGG    |
| Cx3cr1              | NM_009987.3:2696    | GGTCCCAAGTTCAATTCCC      | TTGGATATGCCTGTGGGG    |
| Cxcl1               | NM_008176.1:560     | TTGGGAGACCACTAAGTGCAA    | AAGGGAAGCGTCAACACG    |
| Cxcl10              | NM_021274.1:115     | TGCCGTCATTTTCTGCCT       | CGTGGCAATGATCTCAACA   |
| Cxcl11              | NM_019494.1:345     | CGACAAAGGTGCCTGGAC       | GCCTGGTAATACGTGGCTG   |
| Cxcl9               | NM_008599.2:40      | TCGGACTTCACTCCAACACA     | TTGTTGCAATTGGGGCTT    |
| Emr1                | NM_010130.1:995     | CACCCTGGCTTTGCATCT       | TTCCATATCCTTGGGAGCC   |
| Fcgr1               | NM_010186.5:185     | TCACCTGCAGCCTCCAT        | TTGCAACTGCACAGGGTC    |
| Flt3 <sup>#</sup>   | NM_010229.2:3302    | GCCAAGATTAGCCTCGCC       | ATGGCTTTCCCTCAAGC     |
| Gapdh*              | NM_001001303.1:890  | TCTGAGGGCCCACTGAAG       | GCCATGTAGCCATGAGG     |

|         |                    |                       |                      |
|---------|--------------------|-----------------------|----------------------|
| Gusb*   | NM_010368.1:1735   | CGCCTCGCATGTTTCAGT    | AAAGGCCGAAGTTTTGGG   |
| H2-Ab1  | NM_207105.2:164    | GTGGTGCTGATGGTGCTG    | CAGTACTCGGCGTCTGGC   |
| Hprt*   | NM_013556.2:30     | GCAGCGTTTCTGAGCCAT    | CATCGCTAATCACGACGC   |
| Il10    | NM_010548.1:985    | AGGCTGGCCACACTTGAG    | GGGGGATGACAGTAGGGG   |
| Il10ra  | NM_008348.2:75     | GTAAGGCCGGCTCCAGT     | TGGAGGATGTGCTGGAAAA  |
| Il1a    | NM_010554.4:225    | GGCTCACTTCATGAGACTTGC | GGTGCTGATCTGGGTTGG   |
| Il1b    | NM_008361.3:1120   | CCTCTGATGGCAACCAC     | TGTGCTGGTGCTTCATTCA  |
| Il23a   | NM_031252.1:360    | GCCCCGTATCCAGTGTGA    | GCTGGAGGAGTTGGCTGA   |
| Il4#    | NM_021283.1:345    | AGGGCTTCCAAGGTGCTT    | TGCTCTTAGGCTTTCCAGG  |
| Il6     | NM_031168.1:40     | CAATTCAGAAACCGCTATGA  | TCATTTCCACGATTTCCCA  |
| Irf4    | NM_013674.1:1878   | CAGAGAAACGCATTCTGG    | AGTCCACCAGCTGGCTTTT  |
| Irf5    | NM_012057.3:1826   | GTGGGAGGGAGGGAACAT    | TCTGAAGGAGGGTGCCTG   |
| Itgax   | NM_021334.2:327    | ACAGGCAACTGTGAGCCC    | TGCTGTGCAGTTGGGAAG   |
| Itgb7   | NM_013566.2:1221   | TGTCACCGGTGCAACT      | AGCCTCACCTCCGTCTT    |
| Ly6c1   | NM_010741.2:236    | TGAGACTTCTGCCAGC      | GGTGCTACCTGCAGTGGG   |
| Mrc1    | NM_008625.1:3992   | TCCCTGGTTTCCATCGAG    | CAAAGGCCGAAGATGAA    |
| Nfkb1   | NM_008689.2:2125   | GCCCTTTTCGACTACGCA    | GGCCAAGTGCAGAGGTGT   |
| Nfkb2   | NM_019408.2:1150   | GCAAGCCTTTGGGGACTT    | GCCTTCTCCGCTTCTCTC   |
| Nod2    | NM_145857.2:1086   | TTGAGCACTGCTGCTGG     | GCACCTTGCAAGCATTCT   |
| Nos2#   | NM_010927.3:3715   | CTTGGGGAGACAGCGAAA    | GAGAAGGAGGGAGCTGGG   |
| Pparg#  | NM_011146.1:1060   | TTCGATCCGTAGAAGCCG    | GCTTCCGAGTTTTTTGA    |
| Relb    | NM_009046.2:2013   | TTCCGAAGCCAACCTTGA    | TTAGGGGAGAAGGCTGGG   |
| Retnla  | NM_020509.3:164    | TCTGCATCTCCCTGCTCC    | AGGCAAAGCCACAAGCAC   |
| Rpl19*  | NM_009078.2:92     | GGCCCACAAGCTCTTCC     | AGTCACAGGCTTGCGGAT   |
| Sell    | NM_001164059.1:664 | GACTGCATCCACCCCTTG    | GGTACCCAACCTCAGGGGC  |
| Siglec1 | NM_011426.3:4550   | GCCTGGTTTACAATGGC     | CCATGAGCCTGGTCCTTG   |
| Spi1    | NM_011355.1:171    | CGAAGCAGGGGATCTGAC    | GTGTGCGGAGAAATCCCA   |
| Stat1   | NM_009283.3:1590   | TCCGACACCTGCAACTGA    | ATAGACGCCAGCCACTG    |
| Stat3#  | NM_213659.2:2130   | TTCAGCGAGAGCAGCAAA    | AAATGCCTCCTCCTTGGG   |
| Stat6   | NM_009284.2:3465   | TGCTTTTGCCAGTGTGACC   | ACGCCAGGGAGTTTACA    |
| Tgfb1   | NM_011577.1:1470   | CGCCTGAGTGGCTGTCTT    | ATGTCATGGATGGTGCCC   |
| Tlr1    | NM_030682.1:805    | TCGGCACGTTAGCACTGA    | TCCACGTTGTTTCCACATTG |
| Tlr2#   | NM_011905.2:255    | TCCCCTTCCCTCACTTCC    | GAAACAGTCCGCACCTCC   |
| Tlr4    | NM_021297.2:2510   | GCCTCGAATCCTGAGCAA    | CCTTCTGCCCGGTAAGGT   |
| Tlr8    | NM_133212.2:110    | TCTGGAACCAGTGCCATCT   | TGAGGTTTTGCAGCTTTTGA |

|        |                  |                    |                        |
|--------|------------------|--------------------|------------------------|
| Tnf    | NM_013693.1:1135 | GTGACCTGGACTGTGGGC | TGGCTCTGTGAGGAAGGC     |
| Traf6  | NM_009424.2:980  | GTCCCAGGAGGCAGGTTT | AGCTGTTGGGCAGTCCAG     |
| Trem1  | NM_021406.5:1704 | TGCCCCCTGTGTGAGTCT | TTGTGGTGATGCGGTTTG     |
| Trem2  | NM_031254.2:646  | TGGAACACAGCACCTCCA | TACCTCCGGGTCCAGTGA     |
| Vegfa  | NM_009505.4:1830 | AAGCACGGTCCCTCGTG  | TCCAGTGAAGACACCAATAACA |
| Zbtb46 | NM_028125.1:830  | GGGAAGGAGGACCAGGAA | ATTCTTCTCCGGCCTGT      |

\*Housekeeping genes

#genes excluded from the analysis because a general low detection level



**Supplementary Table 2: List of genes and sequences of respective probes**

| Genes              | Probe A                                                                                        | Probe B                                                                              |
|--------------------|------------------------------------------------------------------------------------------------|--------------------------------------------------------------------------------------|
| Actb*              | AAAAGAGCCTCAGGGCATCGGAACCGCTCGTTGCC<br>AATAGTGATGACCTGCAAAGACGCCTATCTTCCAGT<br>TTGATCGGGAAACT  | CGAAAGCCATGACCTCCGATCACTCATGTAGTTTC<br>ATGGATGCCACAGGATTCCATACCCAAGAAGGAA<br>GGCTGG  |
| Arg1               | TTTTTATTATATAGTGTTCCCCAGGGTCTACGTCTCG<br>CAAGCCAATGCGTGAACCAGATTATGTATGGACGC<br>GCAATAGATA     | CGAAAGCCATGACCTCCGATCACTCAATCCCCAGC<br>TTGTCTACTTCAGTCATGGAGAAAATACTTAATTCC<br>CAGAG |
| Card9              | TCAGAGCTCAGGATGAGCATGTCCAATTGCTGCTGC<br>TTGAGCATTGCAACCATGTGAAGTAATGTGAGCGT<br>ACTT            | CGAAAGCCATGACCTCCGATCACTCAGAGCTCCT<br>GGGAGTTCCTGGGTGAAGTGTCTTCCAAG                  |
| Ccl2               | GCATTAGCTTCAGATTTACGGGTCAACTTCACATTC<br>AAAGGTGCTGAAGACACAAGAATCCCTGCTAGCTG<br>AAGGAGGGTCAAAC  | CGAAAGCCATGACCTCCGATCACTCTCACTCCTAC<br>AGAAGTGCTTGAGGTGGTTGTGGAAAAGGTAGT<br>GGAT     |
| Ccl22              | AGTAAAAGACCCTAGCATGTGGTTGAAGAGGGGGT<br>GAAGTTGATTCTTGGCCTATTGAAGCAATCCTCTCC<br>CCAATACTTAAAAA  | CGAAAGCCATGACCTCCGATCACTCCTTCGACTAT<br>CAGCTACACAGGCAAGGAGTCAAAGGTGTGGGG<br>CAGAGAA  |
| Ccl7               | CTTGAAGATAACAGCTTCCCAGGGACACCGACTACT<br>GGTGATCCTTCTGTCCACGCGATGACGTTCTGCAAG<br>AGTCGCATAATCT  | CGAAAGCCATGACCTCCGATCACTCCCATTCTGA<br>TGGGCTTCAGCACAGACTTCCATGCCCTTCTTGT             |
| Ccl8               | TTCAGACCCGAAGGGGGATCTTCAGCTTTAGTACA<br>TGAAAGCAGCAGGTCATTTGGAATGATGTGTAAGT<br>GGAATAAGACGACG   | CGAAAGCCATGACCTCCGATCACTCAAACCACAG<br>CTTCCATGGGGCACTGGATATTGTTGATTCTCTCG<br>TAGCTT  |
| Ccr2               | ACCACAAACCACAAGTCCCTGTTAATCCTGAGCTGT<br>CTATGTTAGTTTCATCTGTTGAGATTATTGAGCTTCAT<br>CATGACCAGAAG | CGAAAGCCATGACCTCCGATCACTCATCCAGACG<br>GACCTTAGAGTCTAAATCACCATGCTTGATAAGC<br>CCACAG   |
| Ccr7               | GCAGAAACTCATAGCCAGCATAGGCACTAGGAACC<br>CAAAAACCATCTGGGCTAGGACGCAAATCACTTGA<br>AGAAGTGAAGCGAG   | CGAAAGCCATGACCTCCGATCACTCTTCCGCTCAA<br>AGTTGCGTGCCTGGAGCAAGGTACGGATGATAAT<br>GAGGTA  |
| Ccr8 <sup>#</sup>  | CGTGGACAATAGCCAGATACCTGTCCACACTCATT<br>GGGTGATGAAGAACCCTTTATTATGTGTTCTGCTA<br>ACTCTGTTTCTGT    | CGAAAGCCATGACCTCCGATCACTCCACGCTGGC<br>CGTCCTCACCTTGATGGCATAGACAG                     |
| Ccr9               | TGCTTGGATGACTTCTTGGCCTGTACCAAGGTATGA<br>ATGATGATGGTATACTGACACATTAGTAACGTCGGC<br>AAGCACTTAGTCG  | CGAAAGCCATGACCTCCGATCACTCGAGACATAA<br>TGAAGACAGTGAGGACAGTGATGGTCACCTTGAG<br>GGCCTTG  |
| Cd14               | CAATCTGGCTTCGGATCTGAGAAGTTGCAGGAACA<br>ACTTTCCTCGTCTAGCTATTTCTGTTACGGATGAAG<br>GCCTATATCAATG   | CGAAAGCCATGACCTCCGATCACTCCGCCGTACAA<br>TTCCACATCTGCCGCCCCAAACAATTGAAAGCGC<br>TGGAC   |
| Cd163 <sup>#</sup> | GACAATGAGGAGGACCAATAGAATGGCTCCACAAA<br>CCAAGAGTGCCGTGACCTGGAGTTTATGTATTGCCA<br>ACGAGTTTGTCTTT  | CGAAAGCCATGACCTCCGATCACTCGAAACTGTA<br>AGTCGCTGAATCTGTCGTCGTTTACAGAGTCCACAG<br>GAGGAA |
| Cd44               | CCCCGCTGGAAGCAATGCCTAAGGATTGGACTGC<br>TGGAGAGGCAATATGCCATCCACTTTCATGGAAACA<br>ATAAGAGCAGGGAA   | CGAAAGCCATGACCTCCGATCACTCCAGAAGGGA<br>GTCTATAAAGAGAGTATGTAACCAGTACACCTGA<br>TCTCCA   |

|                     |                                                                                               |                                                                                     |
|---------------------|-----------------------------------------------------------------------------------------------|-------------------------------------------------------------------------------------|
| Cd68                | GACACATTGTATTCCACCGCCATGTAGTCCAGGTAG<br>ACTGTACTCGCTTGAGCTCTAGGCCAAAACGACCT<br>TAATGGTCA      | CGAAAGCCATGACCTCCGATCACTCGAAGAGATG<br>AATTCTGCGCCATGAATGTCCACTGTGCTGCCTGT<br>GGGAAG |
| Cd80                | ATTGCAAGCCATAGCTTCAGATGCTTTGGAGAACAT<br>GATGGGGAAAGCCACTTCAGTTAAAGGCTATCTTG<br>CTCCGCTCGTTCTC | CGAAAGCCATGACCTCCGATCACTCAGCCTTGGA<br>CATGGAAACTTGAGGAGTGGTGTATCCTGCATCA<br>ACTGACA |
| Cd86                | TTTTGCTGGTCTGCCAAAATACTACCAGTCACTCA<br>GGCTTATGCTTAAAGCTATCCACGAATGTCAAAAAT<br>GTGGTTT        | CGAAAGCCATGACCTCCGATCACTCTCACACTATC<br>AAGTTTCTCTGTGCCAAATAGTCTCGTACAGAA<br>CCAAC   |
| Cebpb               | TCAAGTCCCGAAACCCGGTGCCTGTGAGGTGCG<br>TGCGCGCAGCAAGAAGGAGTATGGAACCTTAGCA<br>AGAGAG             | CGAAAGCCATGACCTCCGATCACTCCCGTGTCCAC<br>ACGCGCTCAGCCACGTTTGATCCGGATTGCA              |
| Chil3               | TGATCTTATTCTGAGAGTTTCAAGGACAAATCATTG<br>TGTAAGCTCCTCTCATACGAAATTTGAGCAAGCAA<br>TTGAAGGCTTAGA  | CGAAAGCCATGACCTCCGATCACTCTTCTCCATGG<br>AAGCATGATGCAGAATGCGCTGTGGAAAAACCGT<br>TGAACT |
| Csf1r               | ATCTCTCGATGATCTTCCAGCGCACCTGGTACTTCT<br>AGCCCAGATCCTACGAGATGAGTACGTAACCTA                     | CGAAAGCCATGACCTCCGATCACTCGCAACTGAG<br>TAGGGTCAATGAAGGTGTAGCTATTGCCTTCGT             |
| Csf2 <sup>#</sup>   | GGTCTGCACACATGTTAGCTTCTTGAAGGAGAACTC<br>GTTAGAGACGACTTCCCGAATGTATAATGCTGACGT<br>TCTTGCTTTTGGC | CGAAAGCCATGACCTCCGATCACTCTTGGTGAAA<br>TTGCCCGTAGACCCTGCTCGAATATCTCAGGCG             |
| Cx3cl1 <sup>#</sup> | CGTCATGCCGAGGTGCTGACCCGGCAGCAGAGTAC<br>ACAAATGGAAGAACGCCGAGTGCATGAGCTGTCTT<br>TCACATGATACATCG | CGAAAGCCATGACCTCCGATCACTCAAAGCCACT<br>GGGATTCGTGAGGTATCTTGTGCACATGATTTT<br>GCATTT   |
| Cx3cr1              | GCAACAGGCTGGGAGAGACTTCTGAAATGGTTATC<br>ACAACCAACACAGGACACAATCTGCGGGTTAGCA<br>GGAAGGTTAGGGAAC  | CGAAAGCCATGACCTCCGATCACTCTCGACACAAA<br>CATAAGACTGCCAAGGAGATATCAGACATGCCG<br>CCGTGA  |
| Cxcl1               | TAAACTCTATCTCTGCACTTCTTTTCGCACAACAC<br>CCTTCTACTAGCACTTGACGTAGATTGCTATCAGGTT<br>ACGATGACTGC   | CGAAAGCCATGACCTCCGATCACTCACACAGCCTC<br>CCACACATGTCCTCACCCTAATACATAAAAAACAT<br>AATAC |
| Cxcl10              | ATTCTCACTGGCCCGTCATCGATATGGATGCAGTTG<br>CAGCGCTCTGTGAAGTGCATCGGTCCGATCAATTA<br>GTCT           | CGAAAGCCATGACCTCCGATCACTCCTCGCAGGG<br>ATGATTTCAAGCTTCCCTATGGCCCTC                   |
| Cxcl11              | AGGGCTCACAGTCAGACGTTCCAGGATGTCACAT<br>GTTTTGACGCCTTAACTCCCTTTCCAAGTAAATGT<br>ACGGGAATTATCG    | CGAAAGCCATGACCTCCGATCACTCATGTTCCAAG<br>ACAGCAGAGGGTCAGGTTCTTGGCACAGAGTTCT<br>TATTGG |
| Cxcl9               | GATGCCAAAGAGGAAAAGAAGCAGCGGACTTCATGG<br>CAGAGCTGAGTTCTACTACGTTACCGTCTTTATAA<br>GTGAACAAAACCGG | CGAAAGCCATGACCTCCGATCACTCGCATTCTTA<br>TCACTAGGGTTCTCGAACTCCACTGCTCCAGG<br>AAGAT     |
| Emr1                | TGCAGACAGAATTCAGTCCACATTGTAATGGATCTT<br>GGGTGCACTCATCACGAACCTAACTCCTCGTACAT<br>TCCTATTGTTTTT  | CGAAAGCCATGACCTCCGATCACTCCATTTGAAAG<br>TCAGGGAGGCAGCCACAGATGTAGGAGCCTGGT<br>ACATTGG |
| Fcgr1               | GGAGATCTGAACGGCTGTTCCGTTGATAAACCATTG<br>TGTGGAAGTGTCTCAAAGACGCTATCTTCCAGTT<br>TGATCGGGAAACT   | CGAAAGCCATGACCTCCGATCACTTATTGCCAC<br>TGTCTGAAAAGTGGCTCTGGGATGCTATAACTA<br>GGCGT     |

|                   |                                                                                                  |                                                                                     |
|-------------------|--------------------------------------------------------------------------------------------------|-------------------------------------------------------------------------------------|
| Flt3 <sup>#</sup> | GGCAGACAGCATCTAGAGAAAAGTCCAGCGAAGCA<br>ACGGCCTGTAGGCCCGAAGCAATACTGTCGCTACTC<br>TGTATGTCCGT       | CGAAAGCCATGACCTCCGATCACTCCCACCTGTGC<br>GAGGAGAGGTTTGATTTATAGAAGTCACTTTGG<br>AGTAAT  |
| Gapdh*            | ATCGAAGGTGGAAGAGTGGGAGTTGCTGTTGAAGT<br>CGCAGGAGACAACCTCCTCAAGACCTAAGCGACAG<br>CGTGACCTTGTTC      | CGAAAGCCATGACCTCCGATCACTCCAGGAAATG<br>AGCTTGACAAAGTTGTCATTGAGAGCAATGCCAG<br>CCCCGGC |
| Gusb*             | GTTTCATGAAGTCGGCGAAATTCAGATGAGCTC<br>TCCGACCAGTATTCATCCTCTCTTTCTTGGTGTT<br>GAGAAGATGCTC          | CGAAAGCCATGACCTCCGATCACTCTGGCGAGTG<br>AAGATCCCCTCTTGTTCGATTACTCTCAGCGGT<br>GACTG    |
| H2-Ab1            | TCCCGTTGGTGAAGTAGCACTCGCCATGAACTGGT<br>ACACGAAATGCCAATTTGGTTTTACTCCCCTCGATT<br>ATGCGGAGT         | CGAAAGCCATGACCTCCGATCACTCCCAGTTGTA<br>GATGTATCTGGTCACATATCGTATGCGCTGCG              |
| Hprt*             | CTCCGGAAGCAGTGAGGTAAGCCCAACGCTCTCC<br>CACAATTCTGCGGGTAGCAGGAAGGTTAGGGAAC                         | CGAAAGCCATGACCTCCGATCACTCCAAAAAGCG<br>GTCTGAGGAGGAAGCCGGCGGAGGAGGTGCTAC<br>CG       |
| Il10              | TCTGAACTCAGGGATGAGAGCAATTGAAAGGACAC<br>CATAGCAAAGGGCCCCATAAAATTTGGTTTTGCCTTT<br>CAGCAATCAACTT    | CGAAAGCCATGACCTCCGATCACTCTGGTTTCTCT<br>TCCCAAGACCCATGAGTTTCTTCAACTCTCTTA<br>GGAGC   |
| Il10ra            | TAGGCTCAGGCTGGAGATCGTGACGAGGAATGGG<br>AGCAAACGCGACAACACTGGTCAAGACTTGCATGA<br>GGACCCGCAAATTCCT    | CGAAAGCCATGACCTCCGATCACTCAACCACACAT<br>AGGAAGGGCTTGGCAGTTCTGTCCCGTATGCAAT<br>GAATTC |
| Il1a              | ACCCGGCTCTCCTTGAAGGTGAAGTTGGACATCTTT<br>GACGTTTCAGAGGTCCTGAATCAATAGAACAATATC<br>AGTTATGGCGGTG    | CGAAAGCCATGACCTCCGATCACTCGCCGTCTCTT<br>CTTCAGAATCTTCCCGTTGCTTGACGTTGCTGATA<br>CTGTC |
| Il1b              | CAGCTAGTTTCTGTTCTAGAGAGTGCTGCCTAATGT<br>CCCCTTGAATCAACCGTTGTTAATATGACAGGCCG<br>CTAAAGACGTTCT     | CGAAAGCCATGACCTCCGATCACTCAATGAAAGA<br>CCTCAGTGCGGGCTATGACCAATTCATCCCCACA<br>CGTTGA  |
| Il23a             | AAGCCAGACCTTGGCGGATCCTTTGCAAGCAGAAC<br>TGGCTGTTGCTCTTCTTTCGTTGGGACGCTTGAAG<br>CGCAAGTAGAAAAC     | CGAAAGCCATGACCTCCGATCACTCTAGAGCAGG<br>CTCCCCTTTGAAGATGTCAGAGTCAAGCAGGTGC<br>TTATAAA |
| Il4 <sup>#</sup>  | CGAAAGAGTCTCTGCAGCTCCATGAGAACAACACTAGA<br>GTTCTTCTTCAAGCACCGTCTCAGATGAGTGGGTTA<br>ATCAATCAAGTATG | CGAAAGCCATGACCTCCGATCACTCTGGACTCATT<br>CATGGTGCAGCTTATCGATGAATCCAGGCATCGA<br>AAAGCC |
| Il6               | ACCAGCATCAGTCCCAAGAAGGCAACTGGATGGAA<br>GTCTCTTGCCAGCAGACCTGCAATATCAAAGTTAT<br>AAGCGCGT           | CGAAAGCCATGACCTCCGATCACTCCTCTCCGGAC<br>TTGTGAAGTAGGGAAGGCCGTGGTTGTC                 |
| Irf4              | GCAGGATCAGGACATGATAGCCTAGACTGGACCTA<br>AGAACCAAGTCCCCTGGTCTAGGTATCTAATTCGTG<br>GGTCGGGTACT       | CGAAAGCCATGACCTCCGATCACTCAAGGGCAAG<br>AAGAGGGAGCAAACAGGATGTAGGGTCTACTCA<br>GAGAGAGT |
| Irf5              | ACCTAAAAGTTGGCTACCCTGGGGTAATTGGACTC<br>CGTGGTACTAAAGGCATTAGCTCGGATGCTATCAGC<br>TTGCGCCTATTAT     | CGAAAGCCATGACCTCCGATCACTCCCCACAACAC<br>TCCTTGGCAGGTTTTGCTAGAAGAATTGGGGCA            |
| Irgax             | CACAAGCCAACAGCCAGGAAGGGTTGGTGGCAGC<br>AGCAAGGCCTCAAGACCTAAGCGACAGCGTGACCT<br>TGTTTCA             | CGAAAGCCATGACCTCCGATCACTCCCTGTCAAGT<br>ATATATTCTCTGTCATGTGTGGTGCACAGTAGGA<br>C      |

|                    |                                                                                               |                                                                                      |
|--------------------|-----------------------------------------------------------------------------------------------|--------------------------------------------------------------------------------------|
| Itgb7              | GAGTCACAGTGGATGACAGGCTATCATAAGCATCC<br>ATGATGAGCTGCTTTCGGGTATATCTATCATTACT<br>TGACACCT        | CGAAAGCCATGACCTCCGATCACTCATTCAAAGG<br>AGATGCTGACTCCTGGTGGGAGTGGAGAGTGCTC<br>AA       |
| Ly6c1              | GAAAGGCACTGACGGGTCTTTAGTTTCCTTCTTTGA<br>GAGTCCTCAATCAACATCCTCTTCTTTCTTGGTGT<br>GAGAAGATGCTC   | CGAAAGCCATGACCTCCGATCACTCCTGATGTTAG<br>GATCCCTGATTGGCACACCAGCAGGGCAGAAA              |
| Mrc1               | AGACAGGATTGTCGTTCAACCAAAGCCACTTCCCTT<br>CAACATTTCCGAACACCCTGTGGACGGCAACTCA<br>GAGATAACGCATAT  | CGAAAGCCATGACCTCCGATCACTCACAATCATT<br>CGTTCACCAGAGGGATCGCTGTTTTCCAGTTGAC<br>AAAGG    |
| Nfkb1              | AGATCCCTCACAAGCTGAGCGTGGAGGTGGATGAT<br>GGCTAAGCTTACAGATCGTGTGCTCATGACTCCAC<br>AGACGT          | CGAAAGCCATGACCTCCGATCACTCTTCTCATGTT<br>GATGATGTCATCAGAGATCAAACCAGATGTGACT<br>TCCAGC  |
| Nfkb2              | CAGCTGCAGGAACCCGTTACAGGCCTCTCGATCTT<br>CATCTTGTGATAGGCTTGGAGGAGTTGATAGTGGT<br>AAAACAACATTAGC  | CGAAAGCCATGACCTCCGATCACTCTAATATGTGA<br>ACTGTTTGGAGTCCGAGACATCGCCCCACGCTTG<br>CGTTT   |
| Nod2               | GTCCAAGCCATCAAAGGTTAACAGGACACGGTCAG<br>GATGGTCAAGAAGGACACCAGTTAGCGTGGCGTAT<br>ACCATGTTGTTAACA | CGAAAGCCATGACCTCCGATCACTCTGGCGCTCCC<br>GGTCCGTGAACCGAACTTGAAGT                       |
| Nos2 <sup>#</sup>  | TTAGTAGTCCACAATAGTACAATACTACTTGGTAGG<br>GTGGAGGAGGGGGCAAACCTGGAGAGAGAAGTG<br>AAGACGATTTAACCCA | CGAAAGCCATGACCTCCGATCACTCGGAGAAGAA<br>GGGAGGAAAGGGAGAGAGGGGAGGGAGGAGA<br>GGAGAGAGAT  |
| Pparg <sup>#</sup> | CATCGTGTAGATGATCTCATGGACACCATACTTGAG<br>CAGAGTCACTTGGTCTACGTATATATCCAAGTGGT<br>TATGTCCGACGGC  | CGAAAGCCATGACCTCCGATCACTCCCTCTGAGA<br>TGAGGACTCCATCTTTATTCATCAGGGAGGCCAG             |
| Relb               | CCCCTTTCTCTTCCGACTCAGCATTCTGTAAATG<br>GGCTCAAAGAGAACCAGATCTTCATAACGGACAAAC<br>TGAACGGGCCATT   | CGAAAGCCATGACCTCCGATCACTCACAATCTCTG<br>AGAATCTGTCTGAGAAGGGTCCATCTGCAGGA<br>G         |
| Retnla             | GTTCTTGACCTTATTCTCCACGATAATCTCTATGGT<br>CTCATCAGTATTCCTATCAGCTAATAGGTCCGGCTC<br>AACAGTGTATCC  | CGAAAGCCATGACCTCCGATCACTCAGAGAGAGT<br>CTTCGTTACAGTGGAGGGATAGTTAGCTGGATTG<br>GCAAGAA  |
| Rpl19 <sup>*</sup> | TTGGGATCCAACCAGACCTTCTTTTTCCCGACGCGT<br>GTTGAGATTATTGAGCTTCATCATGACCAGAAG                     | CGAAAGCCATGACCTCCGATCACTCCTGACGGGA<br>GTTGGCATTGGCGATTTTCATTGGTCTCA                  |
| Sell               | CAGTCCAAGTAGCTCTTCCCTCAGAACAGTTGA<br>AAGCTATCAATTCGTGACCCCGATCATCCAGTCCAG<br>AA               | CGAAAGCCATGACCTCCGATCACTCATGACCAGTT<br>TCCAGATGCTCCACTGTGTTTCTG                      |
| Siglec-1           | TGTAGTACCAGGAAGTGGAGTGGAGGAGCCGGTC<br>CAGATAAGGTTGTTATTGTGGAGGATGTTACTACA                     | CGAAAGCCATGACCTCCGATCACTCTGTATCATGC<br>ACCTGGCAAAGTAAGCACCAGCGTGAGCCCCG              |
| Spi1               | GTAAGTAACCAAGTCATCCGATGGAGGGGGCGGTGA<br>GGGAAAACCTTCCACAAATGCACTCTATATGGAG<br>GGAGAGTAGCTGGAT | CGAAAGCCATGACCTCCGATCACTCCCCACGAAG<br>GAGTAGTAGTCATGCATTGGACGTTGGTATAGCT<br>CTGAATC  |
| Stat1              | AAGTTCTTCGGTGACAATGAGAGGCCCTCATTAGT<br>TCTGTTCCAGCGTCTATGCATCATGTGCCTACTA<br>GGACATCATGCT     | CGAAAGCCATGACCTCCGATCACTCTCAATCACC<br>AGCCTGGCTGGCACAACCTGGGTTTCAAAGCTAAG<br>AGAGTG  |
| Stat3 <sup>#</sup> | ATCTGGGTCTTGCCACTGATGTCCTTTCCACCCAAG<br>TGAAAGTGACCCACCCCTCAAACGCATTCTTATTG<br>GCAAATGGAA     | CGAAAGCCATGACCTCCGATCACTCCAAATGACAT<br>GTTGTTCCAGCTGCTGCTTGGTGTATGGCTCTACAG<br>ACTGG |

|                   |                                                                                               |                                                                                     |
|-------------------|-----------------------------------------------------------------------------------------------|-------------------------------------------------------------------------------------|
| Stat6             | AGCCACATAGTTACTCCCAAATGATACTGGGTTGC<br>TGCTTATACAATGCCTAAATTGGGAAAAAAGGTTT<br>TAGCTATTGATGG   | CGAAAGCCATGACCTCCGATCACTCGAAACACTG<br>GAAGCATCAAGTTACCCAGGCTAGAGCTTTATGC<br>ATGTCAC |
| Tgfb1             | CGAAAGCCCTGTATTCCGTCTCCTGGTTCAGCCACT<br>GCCTTCCTTCTGTGTTCCAGCTACAAACTTAGAAAC                  | CGAAAGCCATGACCTCCGATCACTCCCACGTGGA<br>GTTTGTATCTTTGCTGTCACAAGAGCAGTGAGCG<br>CTGAAT  |
| Tlr1              | TTCAAGCACACACTTGATGTTAGACAGTTCCAAACC<br>GATCGTAGTGCTGACATGTTGGAGTTAACGGAGAC<br>CCGCCATCGTTTAC | CGAAAGCCATGACCTCCGATCACTCTTCTTTCCAA<br>GCTTTGACAAAGCACGTAAGAAATAAGAGCAGCC<br>CTGGTC |
| Tlr2 <sup>#</sup> | ACCATCAGAAACTATGATTGCGGACACATCTCCTGC<br>CAGTGACCGCCACGATCTGATTTTGCACCTTTCG<br>TATGCTGAG       | CGAAAGCCATGACCTCCGATCACTCGAACGACAT<br>CTTTTCACTTCTAGGTGCGAGAGACTGCCGTCCA<br>ACCTTC  |
| Tlr4              | ACTGGGTTTAGGCCCCAGAGTTTTGTTCTCCTCAGG<br>TCCAAGTTGCTGTGTCCTGCTATACGCATACTGGTC<br>CACATATA      | CGAAAGCCATGACCTCCGATCACTCGTCCATAGCA<br>GAGCCCCAGGTGAGCTGTAGCATTTATTAATTGC<br>AAACAG |
| Tlr8              | GTGCCTTATCTCGTCAAGGATAGCTTCTGGAATA<br>GTTGCTTTATGCGCTCATTTTGAACATACGATTGC<br>GATTACGGAAA      | CGAAAGCCATGACCTCCGATCACTCGGAACTTCAT<br>GCAGTTGACGATGGTTGCATTCTGCAATCACAAG<br>GGAGTT |
| Tnf               | ATTCTGAGACAGAGGCAACCTGACCACTCTCCCTTT<br>GCAGAACTCAGGAACCTGCCAATGCACTCGATCTTG<br>TCATTTTTTTGCG | CGAAAGCCATGACCTCCGATCACTCCTGGAAAAGG<br>TCTGAAGGTAGGAAGGCCTGAGATCTTATCCAGC<br>CTC    |
| Traf6             | ACAGCTTTGATCATGGATCTCTTCTCTTCATATGCC<br>ATGGACACAGCGCTATGCAGACGAGCTGGCAGAG<br>GAGAGAAATCA     | CGAAAGCCATGACCTCCGATCACTCTCTGATGA<br>GGATTGTACCACAGTATTCACAGATGATATTTGCC<br>AGAGG   |
| Trem1             | GGTGGAAACAAGCAAATGCCAGTGTGTCCTAGAGA<br>AAGCACAGGAGCCACCGATTGCTGCATTCCGCTCAA<br>CGCTTGAGGAAGTA | CGAAAGCCATGACCTCCGATCACTCCACTGCTGAA<br>GTAGAAGGAATGGATCTACCATCCTTTTCCACCC<br>AAAGA  |
| Trem2             | AGGCCAGGAGGAGAAGAATGGAGGTGGGTGGGA<br>AGGAGGTCTCTGAGGCTGTTAAAGCTGTAGCAACT<br>CTTCCACGA         | CGAAAGCCATGACCTCCGATCACTCCCACAGCCCA<br>GAGGATGCTGGCTGCAAGAACTTGCTCAGGAG<br>AACGC    |
| VEGFa             | CTTCCGGGCTTGCGATTTAGCAGCAGATATAAGA<br>AAATGGCGAATCCAGCAACAGCCACTTTTTTCCAA<br>ATTTTGCAAGAGCC   | CGAAAGCCATGACCTCCGATCACTCTGTGTATGTG<br>GGTGGGTGTGTCTACAGGAATCCCAGAAACAACC<br>CTAAT  |
| Zbtb46            | AGACCCATAGCTACATCTCCAGGCCACAAAGACTG<br>TGAAGAAACGTCATCCGGGAATCGGCATTTTCGATT<br>CTTAGGATCTAAA  | CGAAAGCCATGACCTCCGATCACTCTCCCTCCATA<br>ATGTGATGGTGAATCTGTTCTTCTTCTGATGCGCA<br>G     |

\*Housekeeping genes

<sup>#</sup>genes excluded from the analysis because a general low detection level

**Supplementary Table 3: List of antibody used**

| Antibody (Mouse) | Clone       | Fluorochrome             | Source                 | Catalog number         | Dilution factor |
|------------------|-------------|--------------------------|------------------------|------------------------|-----------------|
| CCR2             | 475301      | PE                       | R&D                    | FAB5538P               | 1:200           |
| CCR9             | CW-1.2      | AF647, PECy7             | Biologend              | 128708, 128711         | 1:100           |
| CD103            | M290        | AF647, AF488             | Biologend              | 121410, 121408         | 1:200           |
| CD115            | AFS98       | APC                      | Biologend              | 135510                 | 1:200           |
| CD11b            | M1/70       | PE-594, APCCy7, BV605    | Biologend              | 101256, 101226, 101237 | 1:200           |
| CD11c            | N418        | APCCy7, BV605            | Biologend              | 117324, 117334         | 1:200           |
| CD172a           | P84         | PE                       | BD                     | 560107                 | 1:200           |
| CD206            | C068C2      | AF647                    | Biologend              | 141712                 | 1:200           |
| CD4              | RM4-5       | APCCy7                   | Biologend              | 100526                 | 1:200           |
| CD45.1           | A20         | FITC, PE, AF647          | Biologend              | 110706, 110708, 110720 | 1:200           |
| CD45.2           | 104         | FITC, APC, APCCy7, AF700 | Biologend              | 109806, 109814, 109824 | 1:200           |
| CD62L            | MEL-14      | APCCy7, BV711            | Biologend              | 104428, 104445         | 1:200           |
| CD64             | X54-5/7.1   | PECy7, APC               | Biologend              | 139314, 139306         | 1:200           |
| CX3CR1           | SA011F11    | FITC, PE                 | Biologend              | 149020, 149006         | 1:200           |
| Int-a4b7         | DATK32      | PE, APC                  | Biologend              | 120606, 120608         | 1:200           |
| Ly6C             | HK1.4       | PerCPCy5.5, BV711        | Ebioscience, Biologend | 45-5932, 128037        | 1:400           |
| Ly6G             | 1A8         | PE, BV711                | Biologend              | 127607, 127643         | 1:200           |
| MHCII            | M5/114.15.2 | BV510, AF700             | Biologend              | 107635, 107622         | 1:200           |
| Siglec F         | E50-2440    | PE                       | Biologend              | 552126                 | 1:200           |
| DAPI             |             |                          | Carl Roth              | 6843.1                 | 1:1000          |
| 7AAD             |             |                          | Biologend              | 420404                 | 1:20            |
